# Supplementary material
Source: publisher figshare collection journal article supplement (https://tandf.figshare.com/ndownloader/files/8049512)
Supplement: Supplementary file 1 [file 8049512]

## Sheet: App Names and URLs
App Name	Developer	URL(s)	Notes
The Guardian: TDV Missions	Jennifer Ann's Group	https://itunes.apple.com/us/app/the-guardian-tdv-missions/id903895804?mt=8 https://appworld.blackberry.com/webstore/content/59933800/?countrycode=CA&lang=en https://play.google.com/store/apps/details?id=com.a99uno.games.theguardian&hl=en
Circle of 6	The Line Campaign, Inc.	http://www.circleof6app.com/ and https://itunes.apple.com/ca/app/circleof6/id507735256?mt=8
OnWatch	Safety Alert Apps, Inc.	http://www.onwatchoncampus.com/ and http://appsagainstabuse.challengepost.com/submissions/4929-onwatch-a-mobile-app and https://play.google.com/store/apps/details?id=com.onwatch&hl=en
Safety Check	Kimberly Berisford et al. and held by Kimberco Inc.	http://www.kim-q.com/safetycheck.php
BuddySystem LITE	On Demand Safety, Inc.	http://challengepost.com/software/buddysystem-lite-from-on-demand-safety-inc	ondemandsafety.com no longer exists - went to waybackmachine but very little was captured
Safe Circle	App-Order.com	http://challengepost.com/software/safe-circle
YourSafehub.com	BreezyHub57 + Drevell	http://challengepost.com/software/yoursafehub-com	there is yoursafehub.com but not available, only one screenshot on waybackmachine saying it will be available soon, no other details
Pocket Watchdog	JennCohen	http://challengepost.com/software/pocket-watchdog https://www.pocketwatchdogapp.com/ https://www.facebook.com/pages/Pocket-Watchdog/197751963604002 https://twitter.com/pocketwatchdog
The RealHelp App	James Medina	http://challengepost.com/software/the-realhelp-app
Safebook	Possible Worldwide	http://challengepost.com/software/safebook
Safe	Dmitri Fuerle	https://itunes.apple.com/ca/app/kuroo-safe/id403143021?mt=8
EmergenSee App 2.0	EmergenSee, Inc.	http://emergensee.com/
Guardly	Guardly Corp	https://itunes.apple.com/ca/app/guardly/id400742014?mt=8
California State University - Fullerton Personal Safety App	Sleavy	http://appsagainstabuse.challengepost.com/submissions/4890-california-state-university-fullerton-personal-safety-app
BuddyGuard	Mpower Mobile Inc	http://challengepost.com/software/buddyguard--2 http://buddyguard-vip.appsios.net/
Emergency Button App	Songwhale	http://challengepost.com/software/emergency-button-app
MyForce	Soteria Systems LLC	http://challengepost.com/software/myforce http://www.myforce.com/
CheckInOn.Me	Check In On Me, Inc	https://itunes.apple.com/us/app/checkinon.me/id864935899?mt=8
iPotato the Game	jfnsme	http://challengepost.com/software/ipotato-the-game-v1-6-4-apps-against-abuse-edition
Campus Guardian	illumemobile	http://challengepost.com/software/campus-guardian
bSafe	Bipper Inc	http://getbsafe.com/
ApolloPortal	yeswici	http://challengepost.com/software/apolloportal-by-yeswici http://yeswici.com/wordpress/apolloportal/
Silent Bodyguard	JoP12303566	http://www.silentbodyguard.com/Silent_Bodyguard/Main.html
Real Alert App	Michelle Jones	http://challengepost.com/software/real-alert-app https://itunes.apple.com/us/app/real-alert/id436455476?mt=8
PAVE and Security on Campus	Pave, Inc.	https://itunes.apple.com/us/app/shatter-the-silence/id552807862?mt=8 http://appsagainstabuse.challengepost.com/submissions/4926-pave-and-security-on-campus-mobile-application-to-shatter-the-silence-of-sexual-and-dating-violence http://www.screencast.com/t/74f7BHlgYwXI
END3 Corporation	Crystal Talley, end3	http://challengepost.com/software/end3-corporation-app http://prezi.com/l_3dcxv0d5zs/presentation-of-end3/
Good2Go	Lee Ann Allman	http://good2goapp.com/ http://www.slate.com/blogs/xx_factor/2014/09/29/good2go_a_new_app_for_consenting_to_sex.html
Real Time Sex Offender Risk Mgmt	RealTime	http://challengepost.com/software/real-time-sex-offender-risk-mgmt
Meaningful Awareness Exchange (MAX)	Peony Project; Leah Vaughan	http://appsagainstabuse.challengepost.com/submissions/4907-meaningful-awareness-exchange-m-a-x http://www.arcgis.com/home/webmap/viewer.html?webmap=c0377054716b4213a4e18d90357e2322	paper given by the developer for the American Public Health Association: https://apha.confex.com/apha/140am/webprogram/Paper269448.html
FriendSafe	GratefulDead et al	http://appsagainstabuse.challengepost.com/submissions/4905-friendsafe
The R3 App - Recognize, Respond, Refer	Harbor House of Central Florida, Inc.	https://itunes.apple.com/ca/app/r3-app/id491452316?mt=8
td411	CCADV	http://challengepost.com/software/td411 http://www.td411.org/index-4.html
NetProtect	Michelle McKenzie	http://challengepost.com/software/netprotect main website raperesistance.org no longer exists, nothing on waybackmachine
R.I.S.E.	Purple Forge	http://octevaw-cocvff.ca/projects/rise-social-media-app https://itunes.apple.com/app/r.i.s.e./id699769050?ls=1&mt=8 https://play.google.com/store/apps/details?id=com.octevaw.rise
FightBack	CancasM Technologies	http://www.fightbackmobile.com/welcome
LadiesSafe	Blue Level Media Ltd	https://itunes.apple.com/us/app/ladiessafe/id893181159?mt=8
CampusSaVE	PaperJuice, LLC	https://itunes.apple.com/us/app/campussave/id878866693?mt=8
iHope App	Araknsas Coalition Against Domestic Violence	http://ihopeapp.com/
YWCA Safety Siren	YWCA Canada	http://ywcacanada.ca/en/pages/mall/apps
iHelpMe	idan magled	https://itunes.apple.com/us/app/ihelpme/id567630281?mt=8
Alert My Friends	Akhilesh Gutpa	https://itunes.apple.com/us/app/alert-my-friends/id595589159?mt=8
Rescue Me - I need Help	Ravin Sardal	https://itunes.apple.com/us/app/rescue-me-i-need-help/id892281526?mt=8
ICE BlackBox	ICE BlackBox, Inc.	https://itunes.apple.com/us/app/ice-blackbox/id629336149?mt=8
Open i	iApps Technologies Ltd.	https://itunes.apple.com/ca/app/open-i/id577361835?mt=8
EyeGoes - Personal Security Camera Instantly Record and Share Emergency Video and Audio	Eye Got You Covered, Inc.	https://itunes.apple.com/us/app/eyegoes-personal-security/id607917920?mt=8
I'm Being Assaulted	Blue Orange Apps Limited	https://itunes.apple.com/us/app/im-being-assaulted/id355459419?mt=8
RescueMe SNS	BlueFinger Apps	http://www.bluefingerapps.com/en/menu3_rescueme.html
saveME App Pro	Lumen Apps	https://itunes.apple.com/ca/app/saveme-app-pro/id792672250?mt=8
safety4u24-7	safety4u24-7 pty ltd	https://itunes.apple.com/ca/app/safety4u24-7/id580404723?mt=8
WarAgainstRape	SEG Universe	https://itunes.apple.com/us/app/waragainstrape/id920780799?mt=8
Red Panic Button	Ultimate Communication Software Ltd.	http://www.redpanicbutton.com/ https://itunes.apple.com/ca/app/red-panic-button/id422029296?mt=8
StaySafe Personal Safety	Safe Apps Ltd	https://itunes.apple.com/gb/app/staysafe-personal-safety/id775897515?mt=8
Safe Community	Santos&Freire Software	https://itunes.apple.com/ca/app/safe-community/id790683897?mt=8
Self	OPEN Philippines	https://itunes.apple.com/ph/app/self/id646789230?mt=8
Positive Pathways	Mike Ogorman	https://itunes.apple.com/us/app/positive-pathways/id935239714?mt=8&ign-mpt=uo%3D4
Watch Over Me - The Personal Safety App	SECQME SDN BHD	http://watchovermeapp.com/
U ASK Washington, DC	U ASK	http://www.uaskdc.org/ and https://itunes.apple.com/us/app/u-ask-washington-dc/id549868658?mt=8&ign-mpt=uo%3D4
ASK DC	U ASK; Men Can Stop Rape Inc	https://itunes.apple.com/ca/app/dod-safe-helpline/id536773115?mt=8
On Site Violence Prevention	Jeff Whitworth	https://itunes.apple.com/us/app/on-site-violence-prevention/id910788870?mt=8
Speak Up Tips	The Center to Prevent Youth Violence	https://itunes.apple.com/nz/app/speak-up-tips/id514758950?mt=8
eyewitness	Change Agency and Associates Ltd	https://itunes.apple.com/gb/app/eyewitness/id737859885?mt=8
StopaStalker	Nathan Carey	https://itunes.apple.com/us/app/stopastalker/id645238415?mt=8
Wave System Pro	Asallam World	https://itunes.apple.com/ie/app/wave-system-pro/id593035833?mt=8; https://play.google.com/store/apps/details?id=asallamwm.wavesystempro
TipNow	Resiligence	https://itunes.apple.com/us/app/tipnow/id525693431?mt=8
Here for You	Loyola University Chicago	https://itunes.apple.com/ca/app/here-for-you/id739824451?mt=8
TX Safey U	Campus Sentinel, Inc.	https://itunes.apple.com/us/app/tx-safety-u/id669192569?mt=8
DoD Safe Helpline	RAINN for SAPRO	https://itunes.apple.com/ca/app/dod-safe-helpline/id536773115?mt=8
LINA	AppsOnTheSide, LLC	http://www.breakthecycle.org/lina-app and https://itunes.apple.com/us/app/lina/id443740581?mt=8
ZipIt	ChildLine	http://www.childline.org.uk/Play/GetInvolved/Pages/sexting-zipit-app.aspx
Not Your Baby	METRAC	https://itunes.apple.com/ca/app/not-your-baby/id545191859?mt=8
YouthAlert	War Against Violence Corporation	https://itunes.apple.com/ID/app/id646893166?mt=8&ign-mpt=uo%3D4
Consortium Assault Services App	Amherst College	https://itunes.apple.com/us/app/consortium-assault-services/id911043100?mt=8
Rape Crisis Ireland App	Rape Crisis Network Ireland	https://itunes.apple.com/ca/app/rape-crisis-ireland-app/id417716674?mt=8
xOffender	LightRider	https://itunes.apple.com/ca/app/xoffender/id289200904?mt=8
PAAR	Sweb Development	https://itunes.apple.com/ca/app/paar/id386861019?mt=8
Our Rights - Wales	Welsh Government	https://itunes.apple.com/ca/app/our-rights-wales/id634918433?mt=8
Crime Rate USA - Live Handbook	theM Dev	https://itunes.apple.com/us/app/crime-rate-usa-live-handbook/id320032716?mt=8
crime+	Amit Barman	https://itunes.apple.com/ca/app/crime+/id498550359?mt=8
DublinRCC	Theapp4u.com limited	https://itunes.apple.com/UA/app/id737292399?mt=8&ign-mpt=uo%3D4
whatitis	zmq	https://itunes.apple.com/us/app/whatitis/id490594921?mt=8
Choose to Stop	Virtual College	https://itunes.apple.com/ca/app/choose-to-stop/id565132945?mt=8
Teen Dating Violence NYC	Alea lacta Est	https://itunes.apple.com/us/app/teen-dating-violence-nyc/id657285952?mt=8
CSA Awareness	Apptility Software Pvt Ltd	https://itunes.apple.com/ca/app/csa-awareness/id513616154?mt=8
Navy Leader's Guide	National Center for Telehealth & Technology	https://itunes.apple.com/us/app/navy-leaders-guide/id762950101?mt=8
Domestic Violence Information	Connecting People Software	https://itunes.apple.com/us/app/domestic-violence-information/id351697519?mt=8
RespectNotFear	FlexyWeb	https://itunes.apple.com/gb/app/respectnotfear/id444079055?mt=8
Anger Management Hypnosis	Jere Parker	https://itunes.apple.com/us/app/anger-management-hypnosis/id578022661?mt=8
Self Help	Northumberland, Tyne and Wear NHS Foundation Trust	https://itunes.apple.com/ca/app/self-help/id648874696?mt=8
A Call for Help	AES Technologies PVT Ltd	https://itunes.apple.com/us/app/a-call-for-help/id358164879?mt=8
How2StaySafe	Emily Le Hegarat	https://itunes.apple.com/ca/app/how2staysafe/id639583055?mt=8
SAFE Ireland App	SAFE Ireland	https://itunes.apple.com/ie/app/safe-ireland-app/id437781287?mt=8
mindmixer	Infinte Monkeys	https://itunes.apple.com/ca/app/mindmixer/id733258626?mt=8
TheHaven	FlexyWeb	https://itunes.apple.com/us/app/thehaven/id569482081?mt=8
Walking In Her Shoes	BlackVibes.com Inc	https://itunes.apple.com/us/app/walking-in-her-shoes/id904515432?mt=8
CahuillaConsortium	cindytwingraphics	https://itunes.apple.com/ca/app/cahuillaconsortium/id912461683?mt=8
Live Free	Doncare	https://itunes.apple.com/us/app/live-free/id914762702?mt=8
AFE Resources	Stephanie Henry	https://itunes.apple.com/us/app/afe-resources/id936525755?mt=8
PurplePocketBook	Alicia Carr	https://itunes.apple.com/us/app/purplepocketbook/id852392358?mt=8
Bullying No More	Fundacion Aptus	https://itunes.apple.com/us/app/bullying-no-more/id828997293?mt=8
Cyber Bullying	Maple Tree	https://itunes.apple.com/ca/app/cyber-bullying/id500995254?mt=8
RSOSAFE	Bitiya Consulting Inc	https://itunes.apple.com/us/app/rsosafe/id540126950?mt=8
HERO App	Don Elligan, Ph.D., LTD	https://itunes.apple.com/cg/app/hero-app/id529289536?mt=8
TESSA Youth Project	SAMTEQ	https://itunes.apple.com/us/app/tessa-youth-project/id935257403?mt=8
Report Rape Gainesville	Rossy Parker	https://itunes.apple.com/us/app/report-rape-gainesville/id885831469?mt=8
Aspire News	Collective Ray Inc	https://itunes.apple.com/ca/app/aspire-news/id733163167?mt=8
Reduce the Risk	Virtual College	https://itunes.apple.com/us/app/reduce-the-risk/id535462715?mt=8
SafetiPin: Complete Safety App	Ashish Basu	https://itunes.apple.com/us/app/safetipin-complete-safety/id705048491?mt=8; https://play.google.com/store/apps/details?id=com.safetipin1.safetipin1
PreventConnect	California Coalition Against Sexual Assault	https://itunes.apple.com/us/app/preventconnect/id542072909?mt=8 https://play.google.com/store/apps/details?id=com.calcasa.prevcon
Green Dot Violence	OptfinITy Apps	http://app.livethegreendot.org
Hollaback	Hollaback!	http://www.ihollaback.org/resources/iphone-and-droid-apps/ and http://www.ihollaback.org/blog/2013/08/22/questions-about-our-nyc-app-the-faq-is-here/ and https://itunes.apple.com/us/app/hollaback/id379866261?mt=8
Self Defense for Women - Don't be another Statistic	AppWarrior	https://itunes.apple.com/us/app/self-defense-for-women-dont/id382227308?mt=8
Erase any Memory Hypnosis - Overcome PTSD, Forget your Ex Boyfriend or Girlfriend and Heal Completely	Turnt Apps LLC	https://itunes.apple.com/ca/app/erase-any-memory-hypnosis/id581771153?mt=8
Street Defense	CIA-Solutions	https://itunes.apple.com/us/app/street-defense/id501252293?mt=8
Stop Abduction	CIA-Solutions	https://itunes.apple.com/us/app/stop-abduction/id468817159?mt=8
Live To Tell About It	The Illusion Factory	https://itunes.apple.com/us/app/live-to-tell-about-it/id427997030?mt=8
Smart-Safe	Alchemy Solutions	https://play.google.com/store/apps/details?id=com.apwiz.smartsafe
Break Free	Jennifer Ann's Group	https://play.google.com/store/apps/details?id=com.stopTDV.com.breakfree
SAS Self-Defense Handbook	Bob Ibanez	https://play.google.com/store/apps/details?id=appinventor.ai_bhpcrepair.SASselfDefenseManual
Crime Maps	RDR Systems	https://play.google.com/store/apps/details?id=com.rdr.mapscrimes.lite
Ask Someone	rematic media GmbH	https://play.google.com/store/apps/details?id=com.rematic.ask_someone
iMatter	Doncare	https://play.google.com/store/apps/details?id=au.org.doncare.imatter
EyeReport	[in chinese characters]	https://play.google.com/store/apps/details?id=org.eyereport.app
Stop Rape Now	Luccaco *be digital	https://play.google.com/store/apps/details?id=com.luccaco.stoprapenow
George Mason University Mason Watch	Social Sentinel, Inc.	https://play.google.com/store/apps/details?id=com.whitelabel.gmu
Grace's Diary	Jennifer Ann's Group	https://play.google.com/store/apps/details?id=com.jaggam.GraceDiary http://www.amazon.com/gp/product/B008RA3VQA?pldnSite=1
Women's Security	Appsoftindia	https://play.google.com/store/apps/details?id=com.zayaninfotech.security
SilentTearsDV	Silent Tears DV Foundation	https://play.google.com/store/apps/details?id=com.conduit.app_c8599379f2df4d2194a600397cf7fe72.app
FACT Family & Child Treatment	StarWatch Branding, Marketing & PR	https://play.google.com/store/apps/details?id=com.app_fact.layout
Seattle University SafeHawk	Social Sentinel, Inc.	https://play.google.com/store/apps/details?id=com.whitelabel.seattle
La Verne Safety App	Social Sentinel, Inc.	https://play.google.com/store/apps/details?id=com.whitelabel.laverne
Brave Little Panda - English	Asian Alliance for Health	https://play.google.com/store/apps/details?id=org.cchrchealth.ebook.english2
LAPDPacificSafety-DirectoryApp	Emery Newsom	https://play.google.com/store/apps/details?id=com.lapd.org.pacificsafetydirectoryapp
Swarthmore Public Safety	Social Sentinel, Inc.	https://play.google.com/store/apps/details?id=com.whitelabel.swarthmore
The Women's Safety Academy	The Women's Safety Academy, LLC	https://play.google.com/store/apps/details?id=com.mobileapploader.aid219885A
Cirlce of 6 U	Tech 4 Good	https://play.google.com/store/apps/details?id=com.circleof6.williamsuniversity
VIP's Guardian	Rafael Takashima	https://play.google.com/store/apps/details?id=com.nikkeisoft.vipsguardian
FamilyConnect.net Mobile	uKnow.com	https://play.google.com/store/apps/details?id=net.familyconnect http://www.familyconnect.com
Emergency Location SMS	Sandeep Bhutani	https://play.google.com/store/apps/details?id=com.ngo.locationsms
Step In. Speak Up.	Ball State University	https://play.google.com/store/apps/details?id=edu.bsu.stepinspeakup
Consenting Adults	Maia Trading and Investing	https://play.google.com/store/apps/details?id=com.conduit.app_81f9e43c3e924b3c876e3a9c47456b3f.app http://mob.conduit.com/landing/Desktop?appId%3D55f68368-a8e8-4bcb-a186-668a6053363f%23.U6osW41dXCQ&sa=D&usg=AFQjCNFPG54u8I__iB9QRQjXD08xiBFniA
85CA SHARP	JMC Technologies	https://play.google.com/store/apps/details?id=com.app.appc5acaa2bdf1e
StaySafe	StaySafe	https://play.google.com/store/apps/details?id=com.MountMercyCollege.YSI.StaySafe
Sex Offender Search	Family Safety Production	https://play.google.com/store/apps/details?id=com.fsp.android.h
Sex Offender Registry Search	Ink Creature	https://play.google.com/store/apps/details?id=com.inkcreature.predatorfree
Love & Sex Quotient	Jais Joy	https://play.google.com/store/apps/details?id=com.facegenome.sxquotient3
Spartan Help Lines	Michigan State University MATRIX	https://play.google.com/store/apps/details?id=edu.msu.matrix.spartanhelplines
SOS - Stay Safe!	iXtentia	https://play.google.com/store/apps/details?id=com.extentia.sos
Operation Predator	U.S. Immigration and Customs Enforcement	https://play.google.com/store/apps/details?id=com.java.ice
No More Damini	NoMoreDamini	https://play.google.com/store/apps/details?id=com.NoMoreDamini.NMD
Raksha - Women Safety Alert	BharatSewa.com	https://play.google.com/store/apps/details?id=app.raksha
SiS - She is Safe	Dinesh Vadivelu	https://play.google.com/store/apps/details?id=com.isafe
Women's Safety App	Lakshmi Apps	https://play.google.com/store/apps/details?id=com.lakshmi.shakenalert
WomansafeApp	Patronus International	https://play.google.com/store/apps/details?id=com.Patronus.WomanSafePaid
Let's Secure	Latest Technologies	https://play.google.com/store/apps/details?id=com.white.shakedetector
SafeWizard	BNS PRO	https://play.google.com/store/apps/details?id=gr.bnspro.safewizard
BlackBoxx Lite	Qwinix Technologies Inc	https://play.google.com/store/apps/details?id=com.qwinix.blackboxx
me Against Rape	Nebula Studios	https://play.google.com/store/apps/details?id=com.nebulastudios.meagainstrape
Against Rape- Woman Protection	Sun Future Technologies	https://play.google.com/store/apps/details?id=com.sunfuturetechno.trialagainstrape http://www.againstrape.com/
Help Alert	Pioneer MobApps	https://play.google.com/store/apps/details?id=org.helpalert.com
Sex Offender Registry Search	JBS Publishing	https://play.google.com/store/apps/details?id=com.andromo.dev69845.app257966
My Panic Alarm	Jined	https://play.google.com/store/apps/details?id=com.tecworks.panicalarm
Pepper Spray Mobile	Prosper India	https://play.google.com/store/apps/details?id=com.techferry.PS
Scream Alarm!	GoPal Appmaker	https://play.google.com/store/apps/details?id=gopal.appmaker.android.com
Self Defense Guide for Women	appooka	https://play.google.com/store/apps/details?id=com.appooka.selfdefenseguide.AOUVYEOGCDRAWXEMK
Shake for Help - Stop Bullying	BrilliSoft, LLC	https://play.google.com/store/apps/details?id=com.shakeforhelp
Blink Rescue Lite	BRIXTECH COMMUNICATIONS LTD.	https://play.google.com/store/apps/details?id=com.brixtech.blinkrescue
SOS Siren/Whistle	AISS Pvt Ltd	https://play.google.com/store/apps/details?id=com.aiss.siren
Crime Detector	flmCreations	https://play.google.com/store/apps/details?id=com.flmcreations.crime.detector
Protect My Girl!	A+ design, Inc.	https://play.google.com/store/apps/details?id=com.jensu.EmergencyMapPlus
Emergency Signalling	First Impression Technologies	https://play.google.com/store/apps/details?id=com.fitech.emergencysignaling
Secret Guardian	Mohak Bhuta	https://play.google.com/store/apps/details?id=com.mohak.rapesos
With U (Women Safety)	Techila Solutions Pvt. Ltd.	https://play.google.com/store/apps/details?id=com.techila.withu
Teens Care	TWT Digital Ltda	https://play.google.com/store/apps/details?id=com.zoemob.phoneTracker
Sex ViPre	Mobilenation Inc	https://play.google.com/store/apps/details?id=com.mobilenationhq.sarcc
OC Teens Mobile	AmongTheNationsMD	https://play.google.com/store/apps/details?id=com.app_octeens.layout
NACCHO Help	GiveEasy	https://play.google.com/store/apps/details?id=com.giveeasyandroid.naccho
Proof Recorder (free)	Marma	https://play.google.com/store/apps/details?id=com.marmadeveloper.proof_free
LODA	Priyanka Kargupta	https://play.google.com/store/apps/details?id=appinventor.ai_priyankakargupta.LODA
Trafficking in Trinbago	Adrian Alexander	https://play.google.com/store/apps/details?id=com.ima5.fantastic.fighthumantraffickingintrinidadandtobago
BumpyCrowd	BumpyCrowd, Inc.	https://play.google.com/store/apps/details?id=com.salert.app
Sex Offender Search	Chaiyarit Pichan	https://play.google.com/store/apps/details?id=com.msmapp.sexoffendersearch
Report Child Sex Tourism	Cobalt eMedia Solutions	https://play.google.com/store/apps/details?id=eu.report.app
Sexual Grooming Awareness App	Shakeel Aziz - KYL Publishing	https://play.google.com/store/apps/details?id=com.kly.sgaapp
LoveHurts?	JamBickie Productions	https://play.google.com/store/apps/details?id=com.jambickie.sunnykids
Domestic Violence	Vintage Wisdom Ltd	https://play.google.com/store/apps/details?id=com.appsbuilder510191
SafeNight	Caravan Studios, A division of TechSoup Global	https://play.google.com/store/apps/details?id=com.caravan.safenight
ProtectEM	Deann Scott	https://play.google.com/store/apps/details?id=com.valuemaxc.protectem
Friend to Friend	friendtofriend	https://play.google.com/store/apps/details?id=com.appbuilder.u273243p461775
Glean	Programming and Web Development Students	https://play.google.com/store/apps/details?id=appinventor.ai_rdeLosh.GLEAN
Kerala Helpline	Vibes	https://play.google.com/store/apps/details?id=com.vibes.keralaEmergencyhelpline
Protect + Care	DAIBOLA	https://play.google.com/store/apps/details?id=com.daibola.protectcare
One Love My Plan	Mongoose Projects	https://play.google.com/store/apps/details?id=com.james.casegmail.com.onelovempv2
Live911	Live911 Limited	https://play.google.com/store/apps/details?id=com.live_911.android.live911App
Abusive Relationship	MobiXprexx	https://play.google.com/store/apps/details?id=com.hyp.mobi.app025
1-on-1	Dr. Tina Parkman/COPE Inc.	https://play.google.com/store/apps/details?id=com.app_tina.layout
One Love DA	Mongoose Projects	https://play.google.com/store/apps/details?id=org.joinonelove.onelovelite
Echo: Time Travelling Recorder	Marek Rogalski	https://play.google.com/store/apps/details?id=eu.mrogalski.saidit
Call Blocker - FREE	X-Reve	https://play.google.com/store/apps/details?id=com.xreve.callblocker
SMS Blocker Clean Inbox	Optinno Mobitech P. Ltd.	https://play.google.com/store/apps/details?id=com.smsBlocker
Dead2Me Call & Text Blocker	Mike Addesa	https://play.google.com/store/apps/details?id=com.maddesa.dead2me
Stay Safe	Boredbees Tech Solutions India Pvt. Ltd.	https://play.google.com/store/apps/details?id=com.boredbees.standup
Auto Call Recorder - SmartLog+	2TIS.Co.,Ltd	https://play.google.com/store/apps/details?id=com.twotis.smartlogplus
Shake2Safety - Emergency Alert	photonapps	https://play.google.com/store/apps/details?id=com.photon.shake2safety
Stand Up For Yourself	Stand Up	https://play.google.com/store/apps/details?id=com.conduit.app_0647d3891a2e438488d0133040cc9fc1.app
Women Safety Help Totem SOS	TOTEMSOS Firoze Zia Hussain	https://play.google.com/store/apps/details?id=indiahelpline.com
Hawaii Sex Offender Search	NIC Inc.	https://play.google.com/store/apps/details?id=com.ehawaii.sex_offender_search
Alerter - Be Safe/Prevent Crime	Mobindra	https://play.google.com/store/apps/details?id=com.mobindra.free.alerterplus
With-U	With-U	https://play.google.com/store/apps/details?id=com.withu
Woman Safety Shield Protection	SmartShehar.com - Chetan Temker	https://play.google.com/store/apps/details?id=com.smartshehar.besafe.android.app
redEye - Women Safety	rescuer	https://play.google.com/store/apps/details?id=com.jey.jen.redeye
V Care Women's Safety Apps	Scn Media Pvt.Ltd	https://play.google.com/store/apps/details?id=com.appbazooka.womensafety
Suspects Registry - FOR WOMEN	RealBox Media	https://play.google.com/store/apps/details?id=com.suspectsregistry.realbox
SafetyPal	MobiSnow	https://play.google.com/store/apps/details?id=com.mobisnow.safteyapp
Girl Safety	Amrocan Energy Corporation	https://play.google.com/store/apps/details?id=com.emergency.girlsafety.om
sfty - Personal Safety App	Sfty AS	https://play.google.com/store/apps/details?id=com.sftymelive.com
